1 **TITLE**

2 Large scale genome-wide association study in a Japanese population identified 45 novel susceptibility loci for 22  
3 diseases

4

5 **AUTHORS:**

6 Kazuyoshi Ishigaki<sup>1,2,3,4</sup>, Masato Akiyama<sup>1,5</sup>, Masahiro Kanai<sup>1,4,6</sup>, Atsushi Takahashi<sup>1,7</sup>, Eiryo Kawakami<sup>8,9</sup>, Hiroki  
7 Sugishita<sup>9</sup>, Saori Sakaue<sup>1,10,11</sup>, Nana Matoba<sup>1,12</sup>, Siew-Kee Low<sup>1,13</sup>, Yukinori Okada<sup>1,10,14,15</sup>, Chikashi Terao<sup>16</sup>,  
8 Tiffany Amariuta<sup>2,3,4,6,17</sup>, Steven Gazal<sup>4,18</sup>, Yuta Kochi<sup>19</sup>, Momoko Horikoshi<sup>20</sup>, Ken Suzuki<sup>1,10,20,21</sup>, Kaoru Ito<sup>22</sup>,  
9 Yukihide Momozawa<sup>23</sup>, Makoto Hirata<sup>24</sup>, Koichi Matsuda<sup>25</sup>, Masashi Ikeda<sup>26</sup>, Nakao Iwata<sup>26</sup>, Shiro Ikegawa<sup>27</sup>,  
10 Ikuyo Kou<sup>27</sup>, Toshihiro Tanaka<sup>22,28</sup>, Hidewaki Nakagawa<sup>29</sup>, Akari Suzuki<sup>19</sup>, Tomomitsu Hirota<sup>30</sup>, Mayumi Tamari<sup>30</sup>,  
11 Kazuaki Chayama<sup>31</sup>, Daiki Miki<sup>31</sup>, Masaki Mori<sup>32</sup>, Satoshi Nagayama<sup>33</sup>, Yataro Daigo<sup>34,35</sup>, Yoshio Miki<sup>36</sup>, Toyomasa  
12 Katagiri<sup>37</sup>, Osamu Ogawa<sup>38</sup>, Wataru Obara<sup>39</sup>, Hidemi Ito<sup>40,41</sup>, Teruhiko Yoshida<sup>42</sup>, Issei Imoto<sup>43,44,45</sup>, Takashi  
13 Takahashi<sup>46</sup>, Chizu Tanikawa<sup>47</sup>, Takao Suzuki<sup>48</sup>, Nobuaki Sinozaki<sup>48</sup>, Shiro Minami<sup>49</sup>, Hiroki Yamaguchi<sup>50</sup>,  
14 Satoshi Asai<sup>51,52</sup>, Yasuo Takahashi<sup>52</sup>, Ken Yamaji<sup>53</sup>, Kazuhisa Takahashi<sup>54</sup>, Tomoaki Fujioka<sup>39</sup>, Ryo Takata<sup>39</sup>,  
15 Hideki Yanai<sup>55</sup>, Akihide Masumoto<sup>56</sup>, Yukihiro Koretsune<sup>57</sup>, Hiromu Kutsumi<sup>58</sup>, Masahiko Higashiyama<sup>59</sup>, Shigeo  
16 Murayama<sup>60</sup>, Naoko Minegishi<sup>61</sup>, Kichiya Suzuki<sup>61</sup>, Kozo Tanno<sup>62</sup>, Atsushi Shimizu<sup>62</sup>, Taiki Yamaji<sup>63</sup>, Motoki  
17 Iwasaki<sup>63</sup>, Norie Sawada<sup>63</sup>, Hirokazu Uemura<sup>64</sup>, Keitaro Tanaka<sup>65</sup>, Mariko Naito<sup>66,67</sup>, Makoto Sasaki<sup>62</sup>, Kenji  
18 Wakai<sup>66</sup>, Shoichiro Tsugane<sup>68</sup>, Masayuki Yamamoto<sup>61</sup>, Kazuhiko Yamamoto<sup>19</sup>, Yoshinori Murakami<sup>69</sup>, Yusuke  
19 Nakamura<sup>70</sup>, \*Soumya Raychaudhuri<sup>2,3,4,6,17,71</sup>, \*Johji Inazawa<sup>72,73</sup>, \*Toshimasa Yamauchi<sup>21</sup>, \*Takashi Kadowaki<sup>21</sup>,  
20 \*Michiaki Kubo<sup>74</sup>, \*Yoichiro Kamatani<sup>1,75</sup>

21 (\*: corresponding authors)

22

23 **AFFILIATIONS:**

24 1, Laboratory for Statistical Analysis, RIKEN Center for Integrative Medical Sciences, Yokohama, Japan.  
25 2, Divisions of Genetics and Rheumatology, Department of Medicine, Brigham and Women's Hospital, Harvard  
26 Medical School, Boston, MA 02115, USA.  
27 3, Center for Data Sciences, Harvard Medical School, Boston, MA 02115, USA.  
28 4, Program in Medical and Population Genetics, Broad Institute of MIT and Harvard, Cambridge, MA 02142, USA.  
29 5, Department of Ophthalmology, Graduate School of Medical Sciences, Kyushu University, Fukuoka, Japan.  
30 6, Department of Biomedical Informatics, Harvard Medical School, Boston, MA 02115, USA.  
31 7, Department of Genomic Medicine, Research Institute, National Cerebral and Cardiovascular Center, Osaka,  
32 Japan.  
33 8, Healthcare and Medical Data Driven AI based Predictive Reasoning Development Unit, Medical Sciences  
34 Innovation Hub Program (MIH), RIKEN, Yokohama, Japan.  
35 9, Laboratory for Developmental Genetics, RIKEN Center for Integrative Medical Sciences, Yokohama, Japan.  
36 10, Department of Statistical Genetics, Osaka University Graduate School of Medicine, Osaka, Japan.

- 37 11, Department of Allergy and Rheumatology, Graduate School of Medicine, the University of Tokyo, Tokyo,  
38 Japan.
- 39 12, Department of Genetics & UNC Neuroscience Center, University of North Carolina at Chapel Hill, NC, USA.
- 40 13, Cancer Precision Medicine Center, Japanese Foundation for Cancer Research, Tokyo, Japan.
- 41 14, Laboratory of Statistical Immunology, Immunology Frontier Research Center (WPI-IFReC), Osaka University,  
42 Osaka, Japan.
- 43 15, Integrated Frontier Research for Medical Science Division, Institute for Open and Transdisciplinary Research  
44 Initiatives, Osaka University, Osaka, Japan.
- 45 16, Laboratory for Statistical and Translational Genetics, RIKEN Center for Integrative Medical Sciences,  
46 Yokohama, Japan.
- 47 17, Graduate School of Arts and Sciences, Harvard University, Cambridge, MA 02138, USA.
- 48 18, Department of Epidemiology, Harvard T.H. Chan School of Public Health, Boston, MA 02115, USA.
- 49 19, Laboratory for Autoimmune Diseases, RIKEN Center for Integrative Medical Sciences, Yokohama, Japan.
- 50 20, Laboratory for Endocrinology, Metabolism and Kidney Diseases, RIKEN Center for Integrative Medical  
51 Sciences, Yokohama, Japan.
- 52 21, Department of Diabetes and Metabolic Diseases, Graduate School of Medicine, The University  
53 of Tokyo, Tokyo, Japan.
- 54 22, Laboratory for Cardiovascular Diseases, RIKEN Center for Integrative Medical Sciences, Yokohama, Japan.
- 55 23, Laboratory for Genotyping Development, RIKEN Center for Integrative Medical Sciences, Yokohama, Japan.
- 56 24, Institute of Medical Science, The University of Tokyo, Tokyo, Japan.
- 57 25, Graduate School of Frontier Sciences, The University of Tokyo, Tokyo, Japan.
- 58 26, Department of Psychiatry, Fujita Health University School of Medicine, Aichi, Japan.
- 59 27, Laboratory for Bone and Joint Diseases, RIKEN Center for Integrative Medical Sciences, Yokohama, Japan.
- 60 28, Department of Human Genetics and Disease Diversity, Tokyo Medical and Dental University Graduate School  
61 of Medical and Dental Sciences, Tokyo, Japan.
- 62 29, Laboratory for Genome Sequencing Analysis, RIKEN Center for Integrative Medical Sciences, Tokyo, Japan.
- 63 30, Laboratory for Respiratory and Allergic Diseases, RIKEN Center for Integrative Medical Sciences, Yokohama,  
64 Japan.
- 65 31, Department of Gastroenterology and Metabolism, Graduate School of Biomedical & Health Sciences,  
66 Hiroshima University, Hiroshima, Japan.
- 67 32, Department of Gastroenterological Surgery Graduate School of Medicine, Osaka University, Osaka, Japan.
- 68 33, Department of Gastroenterological Surgery, The Cancer Institute Hospital of the Japanese Foundation for  
69 Cancer Research, Tokyo, Japan.
- 70 34, Department of Medical Oncology and Cancer Center, and Center for Advanced Medicine against Cancer, Shiga  
71 University of Medical Science, Shiga, Japan.
- 72 35, Center for Antibody and Vaccine Therapy, Research Hospital, Institute of Medical Science, The University of  
73 Tokyo, Tokyo, Japan.

- 74 36, Department of Genetic Diagnosis, The Cancer Institute, Japanese Foundation for Cancer Research, Tokyo,  
75 Japan.
- 76 37, Division of Genome Medicine, Institute for Genome Research, Tokushima University, Tokushima, Japan.
- 77 38, Department of Urology, Kyoto University Graduate School of Medicine, Kyoto, Japan.
- 78 39, Department of Urology, Iwate Medical University School of Medicine, Iwate, Japan.
- 79 40, Division of Cancer Information and Control, Aichi Cancer Center Research Institute, Nagoya, Japan.
- 80 41, Division of Descriptive Cancer Epidemiology, Nagoya University Graduate School of Medicine, Nagoya, Japan.
- 81 42, Division of Genetics, National Cancer Center Research Institute, Tokyo, Japan.
- 82 43, Division of Molecular Genetics, Aichi Cancer Center Research Institute, Nagoya, Japan.
- 83 44, Risk Assessment Center, Aichi Cancer Center Hospital, Nagoya, Japan
- 84 45, Division of Cancer Genetics, Graduate School of Medicine, Nagoya University, Nagoya, Japan
- 85 46, Aichi Cancer Center, Nagoya, Japan.
- 86 47, Laboratory of Genome Technology, Human Genome Center, Institute of Medical Science, University of Tokyo,  
87 Tokyo, Japan.
- 88 48, Tokushukai Group, Tokyo, Japan.
- 89 49, Department of Bioregulation, Nippon Medical School, Tokyo, Japan.
- 90 50, Department of Hematology, Nippon Medical School, Tokyo, Japan.
- 91 51, Division of Pharmacology, Department of Biomedical Science, Nihon University School of Medicine, Tokyo,  
92 Japan.
- 93 52, Division of Genomic Epidemiology and Clinical Trials, Clinical Trials Research Center, Nihon University School  
94 of Medicine, Tokyo, Japan.
- 95 53, Department of Internal Medicine and Rheumatology, Juntendo University Graduate School of Medicine, Tokyo,  
96 Japan.
- 97 54, Department of Respiratory Medicine, Juntendo University Graduate School of Medicine, Tokyo, Japan.
- 98 55, Fukujuji Hospital, Japan Anti-Tuberculosis Association, Tokyo, Japan.
- 99 56, Aso Iizuka Hospital, Fukuoka, Japan.
- 100 57, National Hospital Organization Osaka National Hospital, Osaka, Japan.
- 101 58, Center for Clinical Research and Advanced Medicine, Shiga University of Medical Science, Shiga, Japan.
- 102 59, Department of General Thoracic Surgery, Osaka International Cancer Institute, Osaka, Japan.
- 103 60, Department of Neurology and Neuropathology (the Brain Bank for Aging Research), Tokyo Metropolitan  
104 Geriatric Hospital and Institute of Gerontology, Tokyo, Japan.
- 105 61, Tohoku Medical Megabank Organization, Tohoku University, Sendai, Japan
- 106 62, Iwate Tohoku Medical Megabank Organization, Iwate Medical University, Iwate, Japan.
- 107 63, Division of Epidemiology, Center for Public Health Sciences, National Cancer Center, Tokyo, Japan.
- 108 64, Department of Preventive Medicine, Institute of Biomedical Sciences, Tokushima University Graduate School,  
109 Tokushima, Japan.
- 110 65, Department of Preventive Medicine, Saga University Faculty of Medicine, Saga, Japan.

- 111 66, Department of Preventive Medicine, Nagoya University Graduate School of Medicine, Nagoya, Japan.  
112 67, Department of Oral Epidemiology, Graduate School of Biomedical and Health Sciences, Hiroshima University,  
113 Hiroshima, Japan.  
114 68, Center for Public Health Sciences, National Cancer Center, Tokyo, Japan.  
115 69, Division of Molecular Pathology, The Institute of Medical Sciences, The University of Tokyo, Tokyo, Japan.  
116 70, Human Genome Center, Institute of Medical Science, the University of Tokyo, Tokyo, Japan.  
117 71, Arthritis Research UK Centre for Genetics and Genomics, Centre for Musculoskeletal Research, Manchester  
118 Academic Health Science Centre, The University of Manchester, Manchester, UK.  
119 72, Department of Molecular Cytogenetics, Medical Research Institute, Tokyo Medical and Dental University,  
120 Tokyo, Japan.  
121 73, Bioresource Research Center, Tokyo Medical and Dental University, Tokyo, Japan.  
122 74, RIKEN Center for Integrative Medical Sciences, Yokohama, Japan.  
123 75, Laboratory of Complex Trait Genomics, Department of Computational Biology and Medical Sciences, Graduate  
124 School of Frontier Sciences, The University of Tokyo, Tokyo, Japan.  
125  
126  
127 Correspondence and requests for materials should be addressed to:  
128 Soumya Raychaudhuri, M.D., Ph.D.  
129 [soumya@broadinstitute.org](mailto:soumya@broadinstitute.org)  
130 Center for Data Sciences, Harvard Medical School, Boston, MA, USA.  
131 Yoichiro Kamatani, M.D., Ph.D.  
132 [yoichiro.kamatani@riken.jp](mailto:yoichiro.kamatani@riken.jp)  
133 Laboratory for Statistical Analysis, RIKEN Center for Integrative Medical Sciences, Yokohama, Japan.  
134

135 **INTRODUCTORY PARAGRAPH**

136 The overwhelming majority of participants in current genetic studies are of European ancestry<sup>1-3</sup>, limiting our  
137 genetic understanding of complex disease in non-European populations. To address this, we aimed to elucidate  
138 polygenic disease biology in the East Asian population by conducting a genome-wide association study (GWAS)  
139 with 212,453 Japanese individuals across 42 diseases. We detected 383 independent signals in 331 loci for 30  
140 diseases, among which 45 loci were novel ( $P < 5 \times 10^{-8}$ ). Compared with known variants, novel variants have lower  
141 frequency in European populations but comparable frequency in East Asian populations, suggesting the advantage  
142 of this study in discovering these novel variants. Three novel signals were in linkage disequilibrium ( $r^2 > 0.6$ ) with  
143 missense variants which are monomorphic in European populations (1000 Genomes Project) including rs11235604  
144 (p.R220W of *ATG16L2*, a autophagy-related gene) associated with coronary artery disease. We further  
145 investigated enrichment of heritability within 2,868 annotations of genome-wide transcription factor occupancy, and  
146 identified 378 significant enrichments across nine diseases (FDR < 0.05) (e.g. NF- $\kappa$ B for immune-related diseases).  
147 This large-scale GWAS in a Japanese population provides insights into the etiology of common complex diseases  
148 and highlights the importance of performing GWAS in non-European populations.

149

150 **MAIN TEXT**

151 We conducted a genome-wide association study (GWAS) of 42 diseases in a Japanese population, comprising  
152 179,660 patients who participated in the BioBank Japan Project (BBJ)<sup>4,5</sup> and 32,793 population-based controls  
153 (Supplementary Table 1). The 42 diseases encompassed a wide-range of disease categories; 13 neoplastic  
154 diseases, five cardiovascular diseases, four allergic diseases, three infectious diseases, two autoimmune diseases,  
155 one metabolic disease, and 14 uncategorized diseases. By including patients with unrelated diagnoses into control  
156 samples, we maximized the power of our GWAS (Supplementary Table 1 and Supplementary Figure 1). We  
157 employed a generalized linear mixed model in our association analysis using SAIGE<sup>6</sup>. Following imputation with  
158 1000 Genomes Project Phase 3 reference data (1KG Phase3)<sup>7</sup>, we tested 8,712,794 autosomal variants and  
159 207,198 X chromosome variants for association with 42 diseases. We estimated their heritability using linkage  
160 disequilibrium score regression (LDSC) analysis<sup>8</sup> (Supplementary Table 2). Consistent with a recent finding in the  
161 European population<sup>9</sup>, incorporating the baselineLD model<sup>10</sup> into the LDSC analysis improved heritability estimation  
162 in our GWAS (Methods; Supplementary Figure 2 and Supplementary Table 2). Although we observed high genomic  
163 inflation factors ( $\lambda_{GC}$ ) for some diseases (e.g.  $\lambda_{GC} = 1.3$  for type 2 diabetes (T2D); Supplementary Table 2), LDSC  
164 analysis indicated that the majority of the inflated chi-squared statistics originated from polygenic effects rather than  
165 confounding biases (e.g. intercept = 1.01 for T2D; Supplementary Table 2). Overall, we detected significant  
166 associations for 30 diseases at 309 autosomal loci (outside of the HLA region) and nine loci on the X chromosome  
167 ( $P < 5 \times 10^{-8}$ ) (Supplementary Table 3 and 4). Associations at the HLA region have been investigated in detail in a  
168 separate article<sup>11</sup>.

169 We further performed conditional analyses in these 318 loci to explore disease-associated variants  
170 independent of the lead variants. We detected 52 additional independent signals for 11 diseases ( $P < 5 \times 10^{-8}$ )  
171 (Supplementary Table 5). The largest number of independent signals in a single locus was seven, found in the  
172 *FAM84B/POU5F1B* locus associated with prostate cancer and in the *KCNQ1* locus associated with T2D.

173 For 35 diseases for which we have both male and female patients, we conducted male- and female-  
174 specific GWAS. We detected 13 additional loci for 10 diseases which were not identified in a sex-combined  
175 analysis ( $P < 5 \times 10^{-8}$ ) (Supplementary Table 6). We tested heterogeneity between effect size estimates for males  
176 and females using Cochran's Q test. This analysis found seven loci showing significant differences in effect size  
177 estimates between sexes ( $P$  values of heterogeneity ( $P_{het}$ )  $< 0.05/13$ ); two asthma loci, a cataract locus, a cerebral  
178 aneurysm locus, and a lung cancer locus were specifically associated with females; and a coronary artery disease  
179 (CAD) locus and a T2D locus were specifically associated with males.

180 In total, we detected 383 independent signals in 331 loci outside of the HLA region for 30 diseases, of  
181 which 45 loci were novel (Figure 1a, Table 1, Supplementary Table 3, 4, and 6). Five novel disease-associated  
182 variants were rare variants (MAF  $< 0.01$ ), and four of them had large effect sizes (odds ratio  $> 2$ , Figure 1b). To  
183 understand the characteristics of novel and known disease-associated variants, we examined their allele  
184 frequencies in East Asian and European populations of 1KG Phase3. Allele frequencies of novel and known  
185 variants were of comparable level in East Asian populations ( $P = 0.35$ , Figure 1c). However, novel variants have  
186 lower allele frequencies than known variants in European populations ( $P = 0.0030$ , Figure 1d). Although both of  
187 novel and known variants have lower allele frequencies in European populations than in East Asian populations,

188 novel variants have larger inter-population differences than known variants ( $P = 0.0047$ , Supplementary Figure 3).  
189 To estimate population specificity in our GWAS results, we compared our results with those reported in previous  
190 European GWAS. We utilized publicly available GWAS summary statistics of European populations for 10 diseases  
191 (Methods), and tested for consistency in direction of effect between populations at 11 novel and 146 known  
192 disease-associated variants from our GWAS; 10 out of 11 novel and 141 out of 146 known variants were replicated  
193 in the same allelic direction in European GWAS (binomial test  $P$  values were 0.011 and  $1.1 \times 10^{-35}$ , respectively;  
194 Supplementary Figure 4). In addition, 595 out of 665 disease-associated variants detected in European GWAS  
195 were replicated in the same allelic direction in our GWAS (binomial test  $P$  values =  $1.1 \times 10^{-104}$ ; Supplementary  
196 Figure 4). These findings suggested that genetic etiologies around the disease-associated variants are generally  
197 shared across populations, and the higher allele frequencies at novel associated variants in our East Asian cohort  
198 increased the efficiency of the variant discovery. This highlights the importance of performing GWAS in non-  
199 European populations.

200 We next investigated the potential impact of the disease-associated variants on protein functions  
201 (Supplementary Table 7). Nine novel variants were in linkage disequilibrium (LD) with missense variants ( $r^2 > 0.6$  in  
202 the 1KG Phase3 East Asian populations) (Table 2). Among them, three missense variants are monomorphic in  
203 European populations (1KG Phase3); p.R220W of *ATG16L2* associated with CAD; p.V326A of *POT1* associated  
204 with lung cancer; and p.E62G of *PHLDA3* associated with keloid (Figure 2 and Supplementary Figure 5). First,  
205 *ATG16L2* is an autophagy-related gene. Although p.R220W of *ATG16L2* is not the lead variant at this locus,  
206 conditioning on this variant cancelled the signal of the lead variant (Figure 2a). Previous GWAS for CAD in



207 European populations did not detect significant associations at this locus<sup>12</sup> (Figure 2a). These findings suggested  
208 that p.R220W of *ATG16L2* which is absent in Europeans may be the causal variant. p.R220W of *ATG16L2* is also  
209 associated with Crohn's disease in a Chinese population<sup>13</sup>, and *ATG16L2* is highly expressed in immune cells.  
210 Therefore, dysregulated autophagy in immune cells might have an important role in CAD. Second, *POT1* is a  
211 member of the telombin family and this protein binds to telomeres, regulating telomere length. Missense variants of  
212 *POT1* have been described to be responsible for several familial cancers<sup>14–16</sup>. Together with a known association at  
213 the *TERT* locus (Supplementary Table 3), we provide additional evidence that telomere dysregulation is pathogenic  
214 for lung cancer. Intriguingly, this association was discovered in the female-specific GWAS, and a significant  
215 heterogeneity in effect sizes between males and females was observed ( $P_{het} = 7.7 \times 10^{-4}$ ) (Figure 2b; Supplementary  
216 Table 6). This finding might help to understand the inter-sex differences in the etiology of lung cancer. Third,  
217 p.E62G of *PHLDA3* is predicted to have a deleterious effect to its protein function (SIFT score<sup>17</sup>=0; CADD  
218 score<sup>18</sup>=33), and we detected a large effect size for keloid (odds ratio = 9.56; 95% CI 5.91-15.45). *PHLDA3* is  
219 known to be a suppressor of AKT<sup>19</sup>, and upregulated AKT signaling pathway is related to increased collagen  
220 production from dermal fibroblasts<sup>20</sup>. Therefore, damaged *PHLDA3* may activate the AKT pathway, promoting the  
221 development of keloid. Together, our study successfully identified novel potential causal genes which would be  
222 hard to be discovered by GWAS in European populations due to restrictive European allele frequencies.

223 We also investigated the potential impacts of the disease-associated variants on the mRNA levels using  
224 two databases of expression quantitative trait locus (eQTL) analysis<sup>21,22</sup>. Out of the remaining 36 novel variants  
225 whose functions were not explained by missense variants, 11 variants were in LD with at least one eQTL variant ( $r^2$

226 > 0.6), regulating the expression of 17 genes in total (Supplementary Table 8); *P2RY13*, *SIAH2*, and *SIAH2-AS1* for  
227 breast cancer; *ATP2B1*, *BET1L*, *POC1B*, and *ZNF767* for cerebral aneurysm; *CCAT1* and *CD40* for Graves's  
228 disease; *GABPB2* for osteoporosis; *MOV10* and *WNT2B* for pancreatic cancer; *CYP2A6* and *CYP2B7P1* for  
229 peripheral artery disease; *ZMIZ1-AS1* for prostate cancer; and *STIM1* and *TRIM21* for urolithiasis. Intriguingly, the  
230 eQTL signals for *ATP2B1* which are in LD with a novel variant of cerebral aneurysm (rs11105352) is highly specific  
231 to arterial tissues (Figure 3). Since the loss of *ATP2B1* in vascular smooth muscle cells induced blood pressure  
232 elevation in mice<sup>23</sup>, decreased expression of *ATP2B1* in arteries might induce hypertension, which leads to  
233 increased risk of cerebral aneurysm.

234 To understand differences in the genetic risks between males and females, we assessed genetic  
235 correlations using LDSC<sup>24</sup> between the results of sex-specific GWAS for the 20 diseases (see Methods for  
236 selection of diseases). Although most correlations are close to one, correlation of asthma was significantly smaller  
237 than one ( $P = 2.2 \times 10^{-3} < 0.05/20$ ; Supplementary Figure 6). This finding suggested that genetic risks of asthma is  
238 slightly different between males and females. To explore the biological mechanism underlying this finding, we  
239 estimated the enrichment of the heritability of male or female asthma in the 220 cell-type specific regulatory regions  
240 using stratified LD-score regression (S-LDSC)<sup>25</sup>. We found significant enrichments for either of male or female  
241 asthma in three annotations; Th0, Th1, and colonic mucosa ( $P < 0.05/220$ ; Supplementary Figure 6). Among them,  
242 the colonic mucosa annotation showed significant heterogeneity in the enrichment of heritability ( $P_{het} = 0.006 <$   
243  $0.05/3$ ). Recent studies suggested that host-microbiome interactions at intestinal mucosa (gut-lung axis) have

244 important roles in the development of asthma<sup>26,27</sup>, and our study suggested that the importance of the gut-lung axis  
245 in asthma might be different between males and females.

246 To acquire more insights to disease biology, we estimated the heritability enrichments in the binding sites  
247 of a variety of transcription factors (TFs) using S-LDSC. We included TF binding sites defined by 2,868 publicly  
248 available chromatin immunoprecipitation sequencing (ChIP-seq) datasets for 410 unique TFs (Supplementary  
249 Table 9). To make mutually comparable data, we began our analysis from the raw sequencing data, and defined TF  
250 binding sites using a uniform protocol (Methods). Using LD-scores of all TF binding sites, we grouped them into 15  
251 clusters (cluster name was defined by the most dominant TF), and performed uniform manifold approximation and  
252 projection (UMAP)<sup>28</sup> to project all TF binding sites into a two-dimensional space (Methods; Figure 4a and  
253 Supplementary Figure 7). To scale the performance of this analysis, we first analyzed previously reported GWAS  
254 for red blood cell-related traits<sup>29</sup> where the critical role of *GATA1* was supported by multiple pieces of evidence<sup>30–34</sup>,  
255 and we successfully recapitulated this biology (Figure 4b). We then applied this analysis to our 24 GWAS results  
256 (see Methods for selection of diseases), and detected 378 significant enrichments for nine disease (FDR < 0.05)  
257 (Figure 4c, Supplementary Figure 8, and Supplementary Table 10). Biologically plausible TFs were highlighted by  
258 this analysis; *RELA*, a subunit of NF- $\kappa$ B, for atopic dermatitis, RA, and Graves' disease; sex hormone receptors  
259 (*AR* and *ESR1*) for prostate cancer; and *FOXA2*, which regulates insulin secretion in pancreatic beta-cells<sup>35</sup>, for  
260 T2D (Figure 4c). This analysis also suggested that *NKX3-1*, a prostate-specific homeobox gene, has an important  
261 role in the biology of prostate cancer (Figure 4c). In addition to this polygenic analysis, the importance of *NKX3-1*  
262 was also suggested by the regional analysis integrating eQTL databases; the risk allele of prostate cancer at

263 *NKX3-1* locus (rs4872174-C) was suggested to decrease the expression of *NKX3-1* (Supplementary Table 8).

264 Consistently, loss of *NKX3.1* expression in human prostate cancers was reported to be correlated with tumor

265 progression<sup>36</sup>. Together, our results confirmed and expanded our current understanding of complex traits in the

266 context of TF activity.

267 In summary, we conducted a large-scale GWAS of 42 diseases in a non-European population and

268 provided rich public resources for genetic studies. Our study provided multiple insights into the etiology of complex

269 traits by integrating annotations of missense variants, eQTL variants, and transcription factor binding site tracks.

270 Currently, genetic studies are overwhelmed by European-descent samples, and the clinical translation of genetic

271 findings would be far more beneficial to European individuals than other populations<sup>1</sup>. Our study contributed to

272 broaden the population diversity in genetic studies and should potentially mitigate the problems originating from this

273 imbalance.

274

275 **TABLE**

276

277 **Table 1. 45 novel loci detected in this GWAS.**

| Disease                                       | Variant     | Chr. | Position  | REF   | ALT    | Gene                            | OR   | L95  | U95  | P        |
|-----------------------------------------------|-------------|------|-----------|-------|--------|---------------------------------|------|------|------|----------|
| <b>Loci detected in sex-combined analysis</b> |             |      |           |       |        |                                 |      |      |      |          |
| Asthma                                        | rs3835894   | 2    | 204576923 | C     | CA     | <i>CD28</i>                     | 1.09 | 1.06 | 1.13 | 3.22E-08 |
| Asthma                                        | rs10797119  | 9    | 92202495  | T     | C      | <i>GADD45G</i><br><i>SEMA4D</i> | 1.11 | 1.07 | 1.15 | 1.45E-08 |
| *Breast cancer                                | rs146383533 | 3    | 150480100 | T     | TTTTTC | <i>SIAH2</i>                    | 0.86 | 0.83 | 0.90 | 1.04E-11 |
| Coronary artery disease                       | rs332827    | 1    | 61743160  | G     | A      | <i>NFIA</i>                     | 1.06 | 1.04 | 1.08 | 3.22E-08 |
| Coronary artery disease                       | rs9720071   | 7    | 155086439 | A     | C      | <i>HTR5A</i><br><i>INSIG1</i>   | 0.94 | 0.91 | 0.96 | 2.03E-08 |
| Coronary artery disease                       | rs11235571  | 11   | 72411843  | G     | A      | <i>ARAP1</i>                    | 0.90 | 0.87 | 0.93 | 2.64E-09 |
| Cataract                                      | rs75812946  | 14   | 86192480  | G     | A      | <i>FLRT2</i>                    | 1.35 | 1.22 | 1.50 | 3.41E-09 |
| Cerebral aneurysm                             | rs12226402  | 11   | 215904    | G     | A      | <i>SIRT3</i>                    | 1.34 | 1.23 | 1.45 | 1.57E-12 |
| Cerebral aneurysm                             | rs78535549  | 12   | 20156904  | C     | T      | <i>AEBP2</i><br><i>PDE3A</i>    | 0.85 | 0.81 | 0.90 | 7.97E-09 |
| Cerebral aneurysm                             | rs11105352  | 12   | 90026462  | G     | A      | <i>ATP2B1</i>                   | 0.85 | 0.81 | 0.90 | 1.22E-08 |
| Cervical cancer                               | rs139337062 | 6    | 123096973 | AAAAC | A      | <i>FABP7</i><br><i>PKIB</i>     | 0.70 | 0.62 | 0.80 | 2.98E-08 |
| Congestive heart failure                      | rs2129981   | 4    | 111704199 | G     | T      | <i>C4orf32</i><br><i>PITX2</i>  | 1.09 | 1.06 | 1.12 | 9.60E-09 |
| Colorectal cancer                             | rs140989504 | 11   | 100439234 | C     | T      | <i>CNTN5</i><br><i>TMEM133</i>  | 1.37 | 1.22 | 1.52 | 2.17E-08 |
| COPD                                          | rs11066008  | 12   | 112140669 | A     | G      | <i>ACAD10</i>                   | 1.29 | 1.21 | 1.37 | 4.34E-17 |
| Graves' disease                               | rs10673095  | 8    | 128203024 | T     | TTC    | <i>FAM84B</i><br><i>POU5F1B</i> | 0.81 | 0.76 | 0.87 | 2.11E-09 |
| Graves' disease                               | rs11065783  | 12   | 111396249 | A     | G      | <i>CUX2</i><br><i>MYL2</i>      | 1.34 | 1.24 | 1.44 | 7.23E-14 |
| Graves' disease                               | rs1569723   | 20   | 44742064  | C     | A      | <i>CD40</i><br><i>NCOA5</i>     | 1.20 | 1.13 | 1.28 | 4.06E-09 |
| Hepatocellular carcinoma                      | rs8107030   | 19   | 39736719  | A     | G      | <i>IFNL2</i><br><i>IFNL3</i>    | 1.44 | 1.28 | 1.62 | 7.96E-10 |

|                                               |             |    |           |    |   |                                  |       |      |       |          |
|-----------------------------------------------|-------------|----|-----------|----|---|----------------------------------|-------|------|-------|----------|
| Interstitial lung disease                     | rs6477542   | 9  | 109507432 | C  | T | <i>TMEM38B</i><br><i>ZNF462</i>  | 1.34  | 1.21 | 1.48  | 6.90E-09 |
| Keloid                                        | rs192314256 | 1  | 201437730 | T  | C | <i>PHLDA3</i>                    | 9.56  | 5.91 | 15.45 | 3.28E-20 |
| Osteoporosis                                  | rs578031265 | 2  | 168857545 | C  | T | <i>STK39</i>                     | 10.16 | 4.74 | 21.74 | 2.38E-09 |
| Pancreatic cancer                             | rs60579835  | 1  | 113113194 | C  | T | <i>ST7L</i>                      | 1.48  | 1.29 | 1.69  | 1.00E-08 |
| Prostate cancer                               | rs11002805  | 10 | 80825897  | G  | A | <i>RPS24</i><br><i>ZMIZ1</i>     | 1.15  | 1.10 | 1.20  | 1.67E-10 |
| Prostate cancer                               | rs1997577   | 21 | 16371102  | A  | T | <i>NRIP1</i><br><i>USP25</i>     | 0.88  | 0.84 | 0.92  | 1.83E-09 |
| Prostate cancer                               | rs138426    | 22 | 38871891  | G  | A | <i>KDELR3</i>                    | 1.19  | 1.13 | 1.25  | 2.04E-12 |
| Type 2 diabetes                               | rs28403309  | 2  | 218782540 | T  | C | <i>CXCR2</i><br><i>TNS1</i>      | 1.06  | 1.04 | 1.08  | 3.76E-08 |
| Type 2 diabetes                               | rs7721099   | 5  | 87936379  | T  | C | <i>MEF2C</i><br><i>TMEM161B</i>  | 1.05  | 1.04 | 1.07  | 1.41E-09 |
| Type 2 diabetes                               | rs200525873 | 5  | 122652913 | GT | G | <i>CEP120</i><br><i>PRDM6</i>    | 0.91  | 0.88 | 0.94  | 4.90E-09 |
| Type 2 diabetes                               | rs39218     | 7  | 89740018  | T  | C | <i>STEAP1</i><br><i>ZNF804B</i>  | 1.06  | 1.04 | 1.08  | 1.28E-09 |
| Type 2 diabetes                               | rs2277339   | 12 | 57146069  | T  | G | <i>PRIM1</i>                     | 1.06  | 1.04 | 1.08  | 4.53E-08 |
| Type 2 diabetes                               | rs17105012  | 14 | 77375691  | C  | A | <i>IRF2BPL</i><br><i>LRRC74A</i> | 1.05  | 1.03 | 1.07  | 1.54E-08 |
| Urolithiasis                                  | rs4148155   | 4  | 89054667  | A  | G | <i>ABCG2</i>                     | 1.12  | 1.08 | 1.16  | 1.70E-08 |
| Urolithiasis                                  | rs12290747  | 11 | 3939650   | T  | C | <i>STIM1</i>                     | 0.89  | 0.85 | 0.92  | 3.24E-09 |
| Arrhythmia                                    | rs73205368  | X  | 23399501  | T  | C | <i>PTCHD1</i>                    | 1.08  | 1.06 | 1.10  | 4.25E-15 |
| Gastric cancer                                | rs1205528   | X  | 108542014 | T  | C | <i>GUCY2F</i><br><i>IRS4</i>     | 0.92  | 0.89 | 0.94  | 2.80E-10 |
| <b>Loci detected in sex-specific analysis</b> |             |    |           |    |   |                                  |       |      |       |          |
| Asthma                                        | rs9836823   | 3  | 26845523  | A  | G | <i>LRRC3B</i><br><i>NEK10</i>    | 0.86  | 0.82 | 0.91  | 5.19E-09 |
| Asthma                                        | rs13227841  | 7  | 73279482  | T  | C | <i>WBSCR28</i>                   | 0.86  | 0.81 | 0.90  | 2.04E-09 |
| Cataract                                      | rs557090273 | 22 | 28942263  | G  | A | <i>TTC28</i>                     | 2.71  | 1.89 | 3.87  | 4.52E-08 |
| Cerebral aneurysm                             | rs855917    | 7  | 149197364 | A  | G | <i>ZNF467</i><br><i>ZNF746</i>   | 1.22  | 1.14 | 1.31  | 2.72E-08 |
| Lung cancer                                   | rs75932146  | 7  | 124487025 | A  | G | <i>POT1</i>                      | 2.29  | 1.71 | 3.05  | 2.21E-08 |
| Osteoporosis                                  | rs2864700   | 1  | 151028929 | C  | T | <i>CDC42SE1</i>                  | 1.18  | 1.11 | 1.25  | 2.03E-08 |

|                           |             |    |           |   |     |                                |      |      |      |          |
|---------------------------|-------------|----|-----------|---|-----|--------------------------------|------|------|------|----------|
| Peripheral artery disease | rs72480748  | 19 | 41414481  | G | A   | <i>CYP2A7</i><br><i>CYP2B6</i> | 1.21 | 1.13 | 1.30 | 3.64E-08 |
| Type 2 diabetes           | rs58202132  | 8  | 121764521 | C | A   | <i>SNTB1</i>                   | 1.08 | 1.05 | 1.11 | 1.28E-08 |
| Type 2 diabetes           | rs2526678   | 11 | 61623793  | G | A   | <i>FADS2</i>                   | 0.93 | 0.91 | 0.96 | 2.44E-08 |
| Type 2 diabetes           | rs202209118 | 18 | 42361423  | T | TCC | <i>SETBP1</i>                  | 1.16 | 1.10 | 1.22 | 7.78E-09 |

278 Summary data of the novel disease-associated variants are provided. For variants detected in sex-specific GWAS,  
 279 statistics of sex with significant associations are provided. REF, reference allele; ALT, alternative allele; OR, odds  
 280 ratio relative to the alternative allele; L95, lower 95% confidence interval; U95, upper 95% confidence interval;  
 281 COPD, chronic obstructive pulmonary disease. \*, SIAH2 locus was also detected in an accompanying GWAS  
 282 project of breast cancer (Lee et al. in submission).  
 283

284

**Table2. Missense variants in LD with nine novel disease-associated variants.**

| Disease                                       | Variant            | Chr.     | Position         | Gene           | Amino acid change  | REF      | ALT      | OR          | L95         | U95          | P               | Allele freq. in 1KG Phase3 |              |              |
|-----------------------------------------------|--------------------|----------|------------------|----------------|--------------------|----------|----------|-------------|-------------|--------------|-----------------|----------------------------|--------------|--------------|
|                                               |                    |          |                  |                |                    |          |          |             |             |              |                 | EAS                        | EUR          | AFR          |
| <b>Loci detected in sex-combined analysis</b> |                    |          |                  |                |                    |          |          |             |             |              |                 |                            |              |              |
| Coronary artery disease                       | <b>rs11235604</b>  | 11       | 72533536         | <b>ATG16L2</b> | <b>p.R220W</b>     | C        | T        | 0.91        | 0.88        | 0.94         | 1.73E-08        | 0.100                      | 0.000        | 0.000        |
| Hepatocellular carcinoma*                     | rs8103142          | 19       | 39735106         | <i>IFNL3</i>   | p.K70R             | T        | C        | 1.38        | 1.23        | 1.54         | 1.14E-08        | 0.083                      | 0.312        | 0.695        |
| <b>Keloid</b>                                 | <b>rs192314256</b> | <b>1</b> | <b>201437730</b> | <b>PHLDA3</b>  | <b>p.E62G</b>      | <b>T</b> | <b>C</b> | <b>9.56</b> | <b>5.91</b> | <b>15.45</b> | <b>3.28E-20</b> | <b>0.010</b>               | <b>0.000</b> | <b>0.000</b> |
| Type 2 diabetes                               | rs2303720          | 5        | 122682334        | <i>CEP120</i>  | p.R921H<br>p.R947H | C        | T        | 0.91        | 0.89        | 0.94         | 1.77E-08        | 0.084                      | 0.026        | 0.048        |
| Type 2 diabetes                               | rs194520           | 7        | 89854446         | <i>STEAP2</i>  | p.F17C             | T        | G        | 1.06        | 1.04        | 1.08         | 1.23E-08        | 0.183                      | 0.512        | 0.286        |
| Type 2 diabetes                               | rs194524           | 7        | 89861832         | <i>STEAP2</i>  | p.R456Q            | G        | A        | 1.06        | 1.04        | 1.08         | 1.18E-08        | 0.183                      | 0.512        | 0.269        |
| Type 2 diabetes                               | rs2277339          | 12       | 57146069         | <i>PRIM1</i>   | p.D5A              | T        | G        | 1.06        | 1.04        | 1.08         | 4.53E-08        | 0.206                      | 0.111        | 0.199        |
| Urolithiasis                                  | rs2231142          | 4        | 89052323         | <i>ABCG2</i>   | p.Q141K            | G        | T        | 1.12        | 1.08        | 1.16         | 1.74E-08        | 0.291                      | 0.094        | 0.013        |
| <b>Loci detected in sex-specific analysis</b> |                    |          |                  |                |                    |          |          |             |             |              |                 |                            |              |              |
| Asthma                                        | rs13246460         | 7        | 73249165         | <i>WBSCR27</i> | p.R216W            | T        | A        | 0.89        | 0.85        | 0.93         | 9.23E-07        | 0.581                      | 0.726        | 0.463        |
| Asthma                                        | rs13232463         | 7        | 73249299         | <i>WBSCR27</i> | p.S171W            | G        | C        | 0.89        | 0.85        | 0.93         | 9.23E-07        | 0.581                      | 0.726        | 0.463        |
| Asthma                                        | rs13241921         | 7        | 73254812         | <i>WBSCR27</i> | p.Q107R            | T        | C        | 0.89        | 0.85        | 0.93         | 9.54E-07        | 0.581                      | 0.726        | 0.464        |
| Asthma                                        | rs11770052         | 7        | 73275565         | <i>WBSCR28</i> | p.I14N             | T        | A        | 0.87        | 0.83        | 0.92         | 3.20E-08        | 0.630                      | 0.726        | 0.285        |
| Asthma                                        | rs13227841         | 7        | 73279482         | <i>WBSCR28</i> | p.W78R             | T        | C        | 0.86        | 0.81        | 0.90         | 2.04E-09        | 0.650                      | 0.677        | 0.334        |
| <b>Lung cancer</b>                            | <b>rs75932146</b>  | <b>7</b> | <b>124487025</b> | <b>POT1</b>    | <b>p.V326A</b>     | <b>A</b> | <b>G</b> | <b>2.29</b> | <b>1.71</b> | <b>3.05</b>  | <b>2.21E-08</b> | <b>0.003</b>               | <b>0.000</b> | <b>0.000</b> |

285

286

287

288

289

290

291

292

293

294

295

Summary data of the missense variants in LD ( $r^2 > 0.6$ ) with novel disease-associated variants are provided. For variants detected in sex-specific GWAS, statistics of sex with significant associations are provided. Rows highlighted in bold indicate east Asian-specific variants (MAF = 0 in Europeans of 1KG Phase3). REF, reference allele; ALT, alternative allele; Allele freq., allele frequency of alternative allele; OR, odds ratio relative to the alternative allele; L95, lower 95% confidence interval; U95, upper 95% confidence interval; EAS, East Asian populations; EUR, European populations; and AFR, African populations. \*, the lead variant at this region (rs8107030) is in LD ( $r^2 = 0.880$ ) with ss469415590 (comprised of rs67272382 and rs74597329). ss469415590 is a frameshift variant of *IFNL4*<sup>37</sup> (not listed as a functional gene in GRCh37 coordinates), and it might also explain this association.



296 **FIGURE**

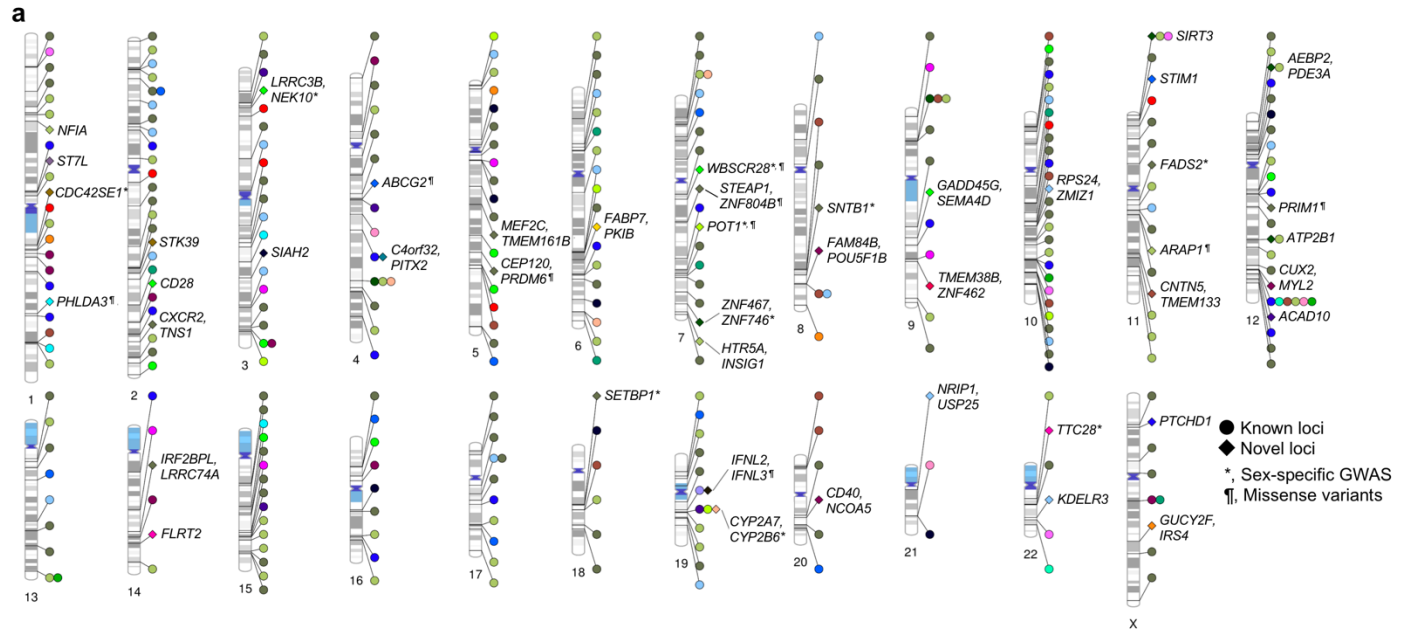

297

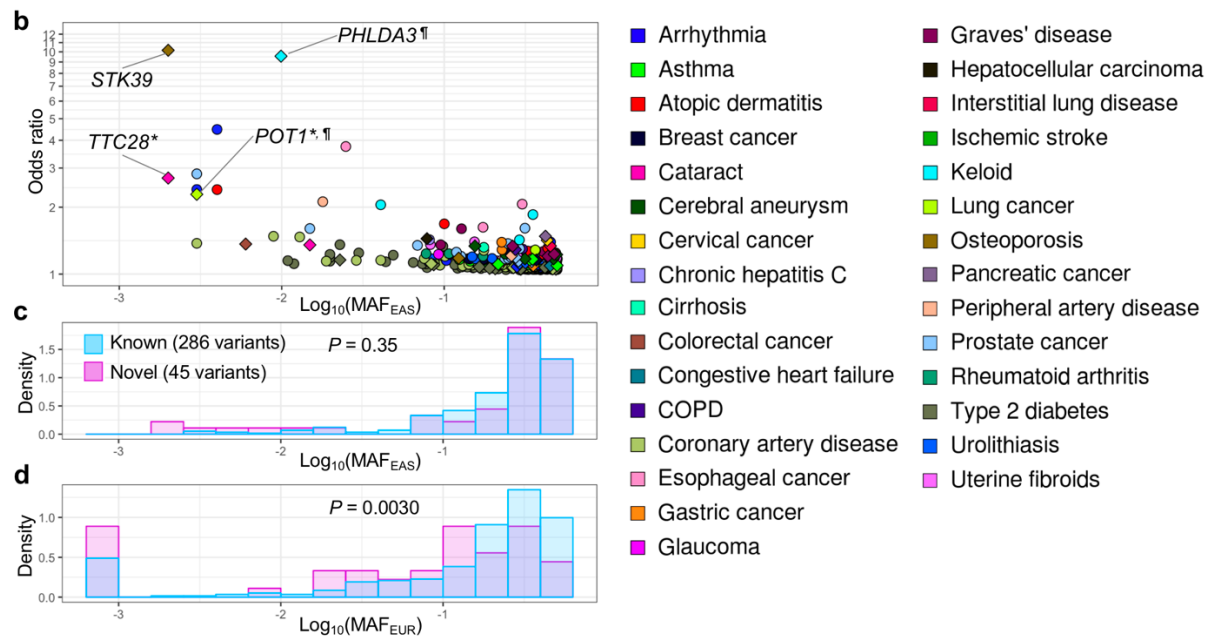

298

299 **Figure 1. Overview of 331 loci detected in this GWAS.**

300 **a**, Phenogram<sup>38</sup> of 331 loci detected in this GWAS. Novel loci (◆) were annotated by the closest gene names.  
 301 Pleiotropic associations (see Methods for its definition) were plotted at the same position. **b**, Allele frequencies and  
 302 the odds ratios of the lead variants at 331 loci detected in this GWAS. The odds ratio of the risk allele was used. \*,  
 303 loci detected in sex-specific GWAS. ¶, the lead variants are in LD with missense variants ( $r^2 > 0.6$ ). **c**, **d**, Allele  
 304 frequencies of the lead variants were compared between novel loci and known loci (**c**, East Asian populations; **d**,  
 305 European populations). The difference in MAF was tested by Mann–Whitney U test, and its  $P$  value was provided.

306 When  $MAF < 0.001$ , MAF was adjusted to 0.001 to fit in log scale.  $MAF_{EAS}$ , MAF in East Asian population (1KG  
307 Phase3).  $MAF_{EUR}$ , MAF in European population (1KG Phase3).

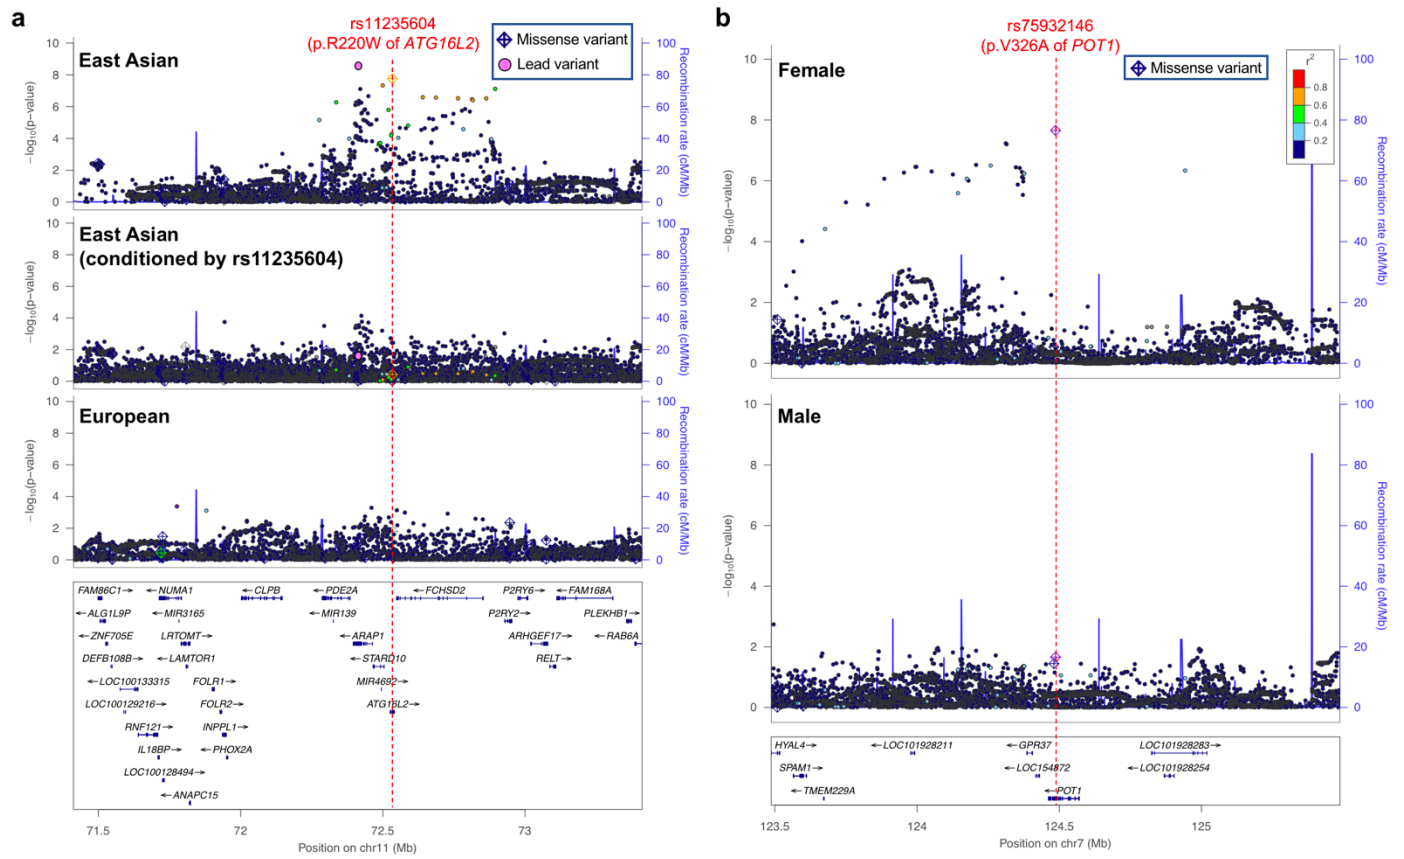

308

309

310 **Figure 2. Novel associations which can be explained by East Asian-specific missense variants.**

311 Regional association plots are provided (**a**, coronary artery disease; and **b**, lung cancer). For coronary artery  
 312 disease (**a**),  $P$  values from conditional analysis and those in European GWAS<sup>12</sup> were plotted separately. For lung  
 313 cancer (**b**),  $P$  values from female- and male-specific GWAS were plotted separately.

314

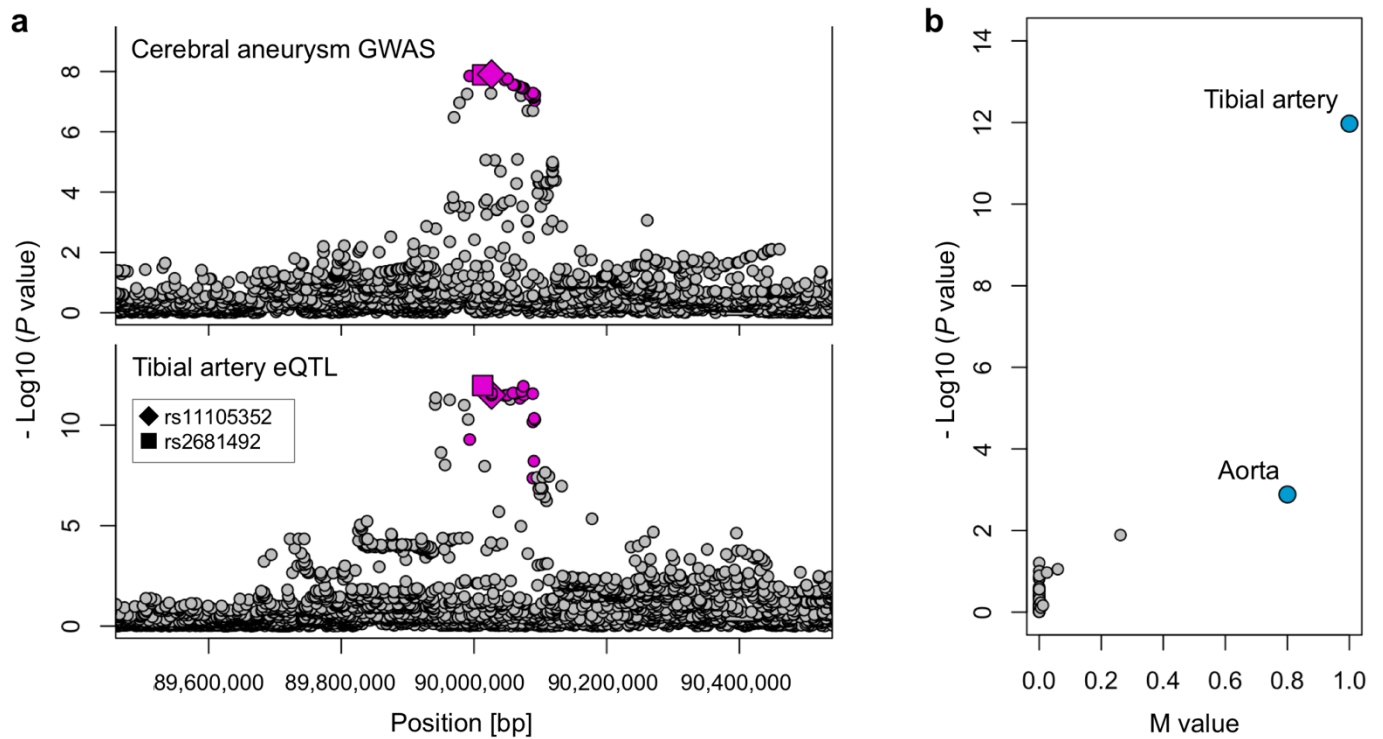

315

316

317

318

319

320

321

322

323

324

325

326

**Figure 3. A novel association of cerebral aneurysm can be explained by artery-specific eQTL signals for *ATP2B1*.**

**a.** Regional association plots of cerebral aneurysm GWAS at *ATP2B1* locus (top) and those of eQTL signals for *ATP2B1* in the tibial artery (bottom) are provided. The lead variant of GWAS (rs11105352;  $\blacklozenge$  dot) and the lead variant of eQTL (rs2681492;  $\blacksquare$  dot) are indicated by different shapes. Variants in LD with rs11105352 are highlighted by red ( $r^2 > 0.6$  both in East Asian and European populations of 1KG Phase3). **b.** Tissue-specificity of eQTL signals for *ATP2B1* at rs2681492 (the lead variant of eQTL in the tibial artery ( $\blacksquare$  dot in **a**)).  $P$  values in eQTL analysis and M values (the posterior probability that an eQTL effect exist in each tissue tested in the cross-tissue meta-analysis) in all tissues in GTEx project<sup>39</sup> are provided. Each dot indicates each tissue. All statistics of eQTL analysis were derived from release v7 of GTEx project<sup>39</sup>.

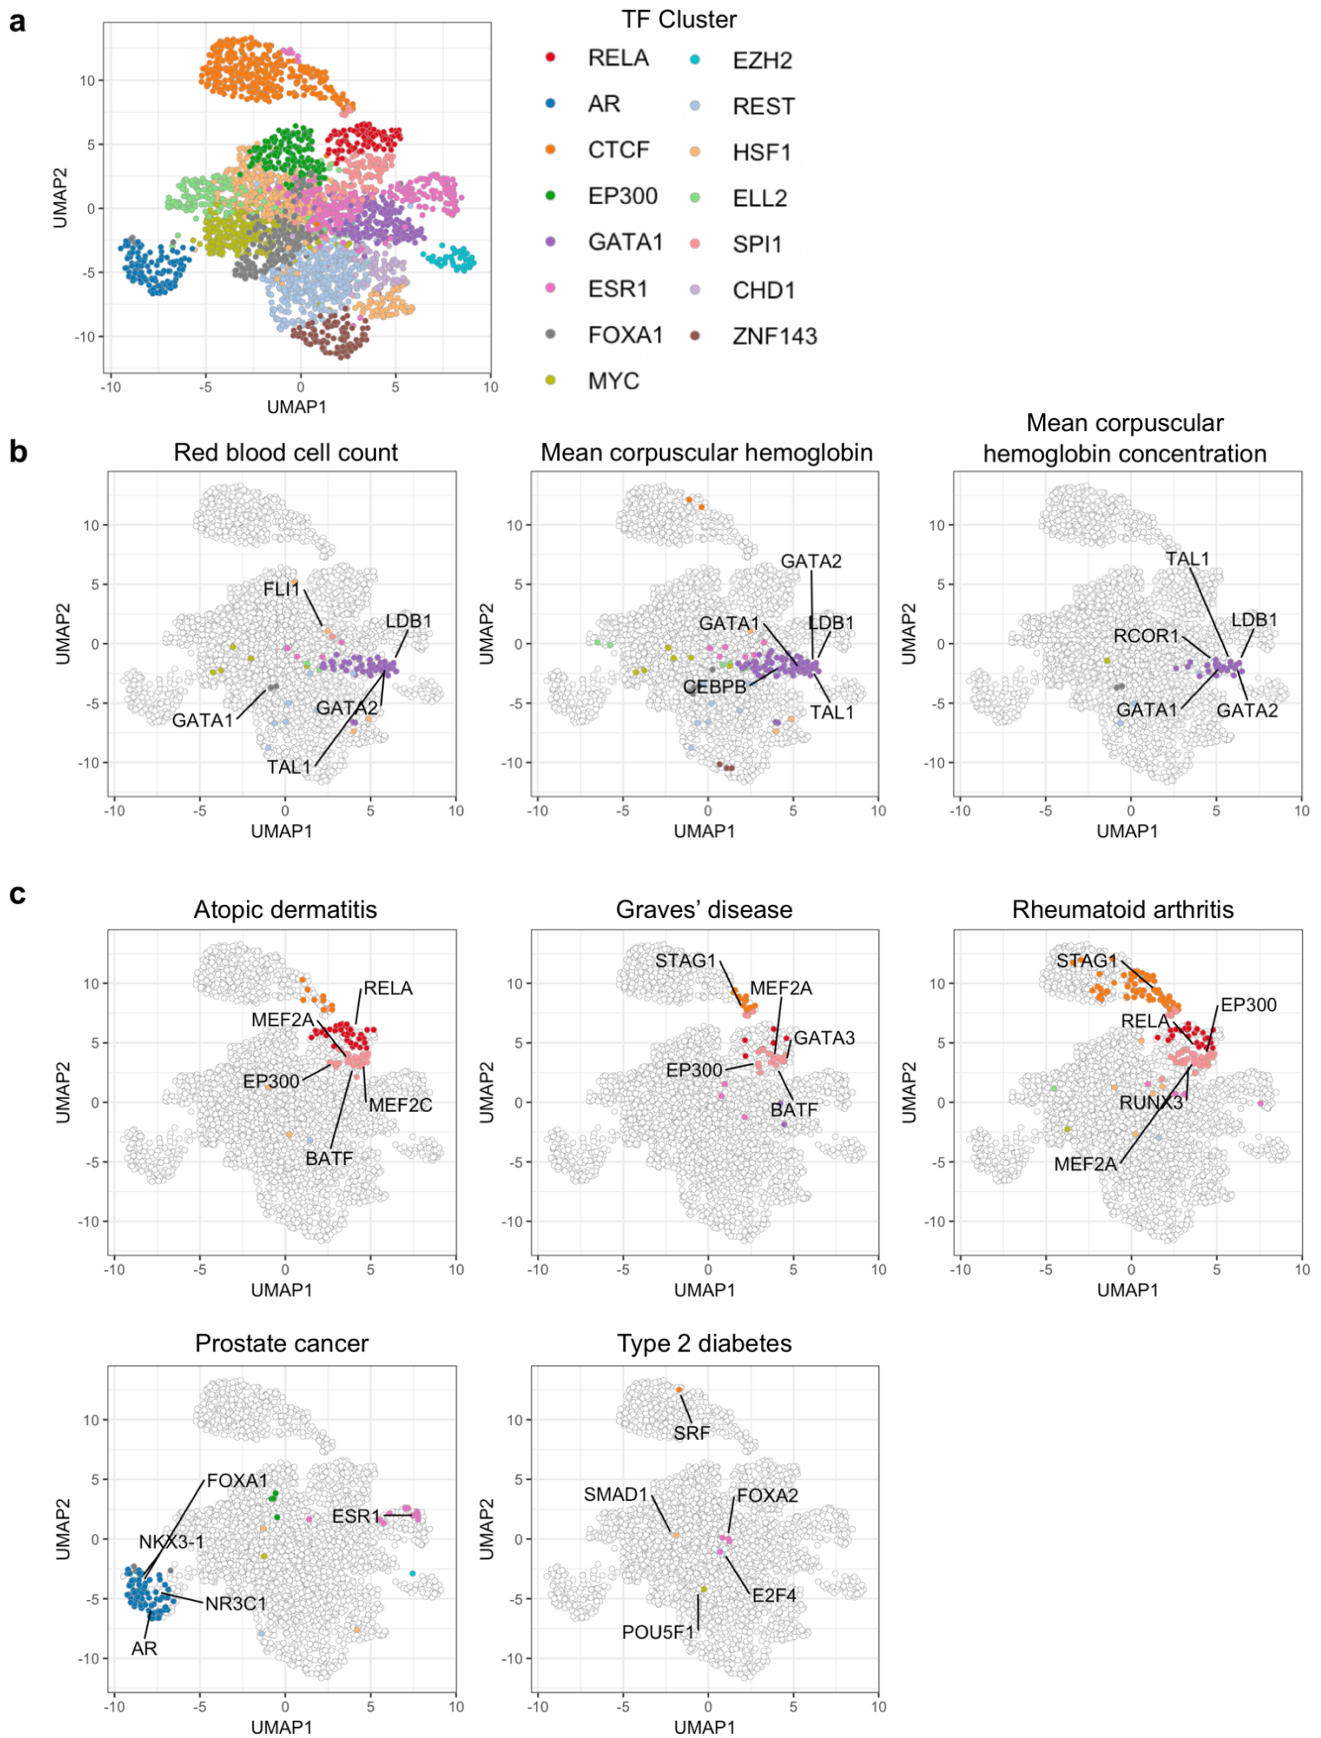

327

328

329 **Figure 4. Transcription factors whose binding sites were enriched for heritability of diseases.**  
330 **a**, All of the 2,868 sets of TF binding sites grouped into 15 clusters were plotted in the UMAP space. **b and c**, The  
331 results of S-LDSC were plotted on the UMAP space. The significant results (FDR < 0.05) are highlighted by cluster-  
332 specific colors. The names of the top five most significant TFs are also shown on the plot. **b**, The results of red  
333 blood cell-related traits. **c**, The results of diseases in this GWAS which had more than five significant TF binding  
334 site tracks (the results of other diseases are provided in Supplementary Figure 8).  
335  
336

## 337 **ONLINE METHODS**

### 338 **Subjects**

339 All case samples in this GWAS were collected in the BioBank Japan Project (BBJ)<sup>4,5</sup>, which is a biobank that  
340 collaboratively collects DNA and serum samples from 12 medical institutions in Japan and recruited approximately  
341 200,000 patients with the diagnosis of at least one of 47 diseases. Among them, cases with dyslipidemia were  
342 excluded because it was already reported in our previous study<sup>29</sup>. Amyotrophic lateral sclerosis and febrile seizure  
343 were also excluded due to limited sample size. Cases with myocardial infarction, stable angina, and unstable  
344 angina were re-classified into a single disease category (coronary artery disease). Thus, we analyzed 42 disease in  
345 this study. For control samples, we used samples from the population-based prospective cohorts; the Tohoku  
346 University Tohoku Medical Megabank Organization (ToMMo), Iwate Medical University Iwate Tohoku Medical  
347 Megabank Organization (IMM)<sup>40</sup>, the Japan Public Health Center–based Prospective Study and the Japan Multi-  
348 institutional Collaborative Cohort Study. In addition, we also included samples in BBJ without related diagnoses into  
349 control group (Supplementary Figure 1). The sample sizes and the demographic data are provided in  
350 Supplementary Table 1. All participating studies obtained informed consent from all participants by following the  
351 protocols approved by their institutional ethical committees. We obtained approval from ethics committees of  
352 RIKEN Center for Integrative Medical Sciences, and the Institute of Medical Sciences, The University of Tokyo.

### 354 **Genotyping**

355 We genotyped samples with the Illumina HumanOmniExpressExome BeadChip or a combination of the Illumina  
356 HumanOmniExpress and HumanExome BeadChips. For quality control (QC) of samples, we excluded those with (i)  
357 sample call rate < 0.98 and (ii) outliers from East Asian clusters identified by principal component analysis using the  
358 genotyped samples and the three major reference populations (Africans, Europeans, and East Asians) in the  
359 International HapMap Project<sup>41</sup>. For QC of genotypes, we excluded variants meeting any of the following criteria: (i)  
360 call rate < 99%, (ii)  $P$  value for Hardy Weinberg equilibrium (HWE) <  $1.0 \times 10^{-6}$ , and (iii) number of heterozygotes  
361 less than five. Using 939 samples whose genotypes were also analyzed by whole genome sequencing (WGS), we  
362 added additional QC based on the concordance rate between genotyping array and WGS. Variants with a  
363 concordance rate < 99.5% or a non-reference discordance rate  $\geq 0.5\%$  were excluded. We note that the allele  
364 frequency of rs671 (the East Asian-specific functional missense variant at ALDH2) substantially varies among the  
365 domestic regions within Japan due to strong selection pressure<sup>42</sup> and that genotypes of rs671 did not follow HWE.  
366 We thus did not apply the HWE QC for rs671. We had confirmed the 100% concordance of rs671 genotypes  
367 between the SNP microarray data used in this study and our internal WGS data ( $n = 2,798$ ; see details in Matoba  
368 N. et. al. manuscript in revision).

### 370 **Imputation**

371 We utilized all samples in the 1000 Genomes Project Phase 3 (version 5)<sup>7</sup> as a reference for imputation. We first  
372 prephased the genotypes with SHAPEIT2 (v2.778) and then imputed dosages with minimac3 (v2.0.1). After  
373 imputation, we excluded variants with imputation quality of  $Rsq < 0.7$ . For X chromosome, we performed

374 prephasing and imputation separately for males and females, and we excluded variants with imputation quality of  
375  $R_{sq} < 0.7$  in either of them.

376

### 377 **Genome-wide association analysis**

378 We conducted a GWAS by employing a generalized linear mixed model (GLMM) using SAIGE (v0.29.4.2)<sup>6</sup>. This  
379 strategy enabled us to maintain related samples in our GWAS, and the sample sizes were increased by 6% on  
380 average compared to removing related samples. Briefly, there are two steps in SAIGE. In step 1, we fit a null  
381 logistic mixed model using genotype data, and we added covariates in this step (see below). In step 2, we  
382 performed the single-variant association tests using imputed variant dosages. We applied the leave-one-  
383 chromosome-out (LOCO) approach. For the X chromosome, we conducted GWAS separately for males and  
384 females, and merged their results by inverse-variance fixed-effect meta-analysis. We used only female control  
385 samples for GWAS of female-specific diseases; breast cancer, cervical cancer, endometrial cancer, ovarian cancer,  
386 endometriosis, and uterine fibroids. Similarly, we used only male control samples for GWAS of prostate cancer. We  
387 incorporated age and top 5 principal component (PC) as covariates. We also used sex as covariate for GWAS of  
388 diseases which include both of male and female samples. We created regional association plots by LocusZoom  
389 (v1.2)<sup>43</sup>.

390 We performed stepwise conditional analysis within  $\pm 1$  Mb from the lead variant; we repeated the  
391 association test by additionally incorporated the dosages of the identified variants as covariates in SAIGE step 1  
392 until we do not detect any significant associations.

393 We also conducted male-specific and female-specific GWAS using the same pipeline as described above,  
394 and estimated heterogeneity in the effect size estimates using Cochran's Q test.

395 We set a genome-wide significance threshold at  $P = 5.0 \times 10^{-8}$ . For each disease, we defined a  
396 significantly associated locus as a genomic region within  $\pm 1$  Mb from the lead variant. When a locus did not include  
397 any variants which were previously reported to be significantly associated with the same disease ( $P < 5.0 \times 10^{-8}$ ),  
398 we defined it as a novel locus.

399

### 400 **Estimation of heritability**

401 We estimated heritability and confounding bias in our GWAS results with LDSC (v1.0.0)<sup>8</sup> using the baselineLD  
402 model (v2.1)<sup>10</sup> which include 86 annotations, including 10 MAF- and 6 LD-related annotations that correct for bias in  
403 heritability estimates<sup>9</sup>, and were calculated using 481 East Asian samples in 1KG Phase3. For the analysis using  
404 LDSC, we excluded variants in the HLA region (chr6:26 Mb-34 Mb). We also calculated heritability Z-score to  
405 assess the reliability of heritability estimation.

406 Absolute quantification of heritability estimation using GWAS results using GLMM can be biased because  
407 effective sample size could be different from the true sample size (relative quantification is not biased, and hence  
408 GWAS results using GLMM can be applied for genetic correlation analysis and S-LDSC safely). Therefore, to  
409 confirm the robustness of heritability estimation in our analysis, we also performed GWAS using generalized linear  
410 regression model (GLM). As simple GLM does not account for the bias caused by genetic relationships, we further



411 excluded related samples ( $\hat{\pi} > 0.187$ ), and we analyzed genotype data with PLINK (v1.90)<sup>44</sup> using the same  
412 covariates as described above. Heritability estimates based on GWAS using two different methods (SAIGE vs  
413 PLINK) were comparable level (Supplementary Table 2).

414

### 415 **Comparison of GWAS results between populations**

416 To compare the GWAS results of our study with those conducted in European populations, we prepared publicly  
417 available GWAS summary statistics for 10 diseases. Summary statistics for eight diseases were downloaded from  
418 GWAS Catalog (URL) and their names and their PMID were as follows; atrial fibrillation (30061737), breast cancer  
419 (29059683), coronary artery disease (29212778), glaucoma (29891935), ischemic stroke (29531354), prostate  
420 cancer (29892016), rheumatoid arthritis (24390342), and type 2 diabetes (30054458). Summary statistics of two  
421 diseases were downloaded from UK Biobank GWAS summary statistics at Neale Lab (URL) and their names and  
422 their phenotype code were as follows; asthma (22127), and congestive heart failure (I50).

423

### 424 **Pleiotropy**

425 We utilized the following variants detected in GWAS for each disease; (i) lead variants in the significantly  
426 associated loci, (ii) independent signals detected by conditional analysis, and (iii) lead variants detected in sex-  
427 specific GWAS. We defined pleiotropic association when these variants were in LD ( $r^2 > 0.6$ ). We calculated  $r^2$   
428 using East Asian samples in the 1KG Phase3<sup>7</sup> by PLINK (v1.90)<sup>44</sup>.

429

### 430 **Functional annotation of associated variants**

431 We utilized the same disease-associated variants as used in the previous section for this analysis. We calculated  $r^2$   
432 using East Asian samples ( $r^2_{EAS}$ ) and European samples ( $r^2_{EUR}$ ) in the 1KG Phase3<sup>7</sup> by PLINK (v1.90)<sup>44</sup>. We  
433 annotated disease-associated variants with eQTLs detected in the Japanese population<sup>21</sup> in the following  
434 conditions; (i) the lead variants in eQTL study is in LD ( $r^2_{EAS} > 0.6$ ) with GWAS variants and (ii) Q value of the lead  
435 variants in eQTL study is less than 0.05. We annotated GWAS variants with eQTL detected in the European  
436 population (release v7 of GTEx project)<sup>39</sup> in the following conditions; (i) the lead variants of eQTL study is in LD  
437 ( $r^2_{EAS} > 0.6$  and  $r^2_{EUR} > 0.6$ ) with GWAS variants and (ii) Q value of the lead variants in eQTL study is less than  
438 0.05.

439 For the annotation of exonic nonsynonymous variants, we used ANNOVAR<sup>45</sup>. We annotated GWAS  
440 variants with nonsynonymous variants when they are in LD ( $r^2_{EAS} > 0.6$ ). GRCh37 coordinates were used in this  
441 study.

442

### 443 **Genetic correlations between sex-specific GWAS**

444 We estimated genetic correlations between our GWAS results by LDSC (v1.0.0)<sup>8</sup> using East Asian LD scores which  
445 we presented in our previous study<sup>29</sup>. We excluded variants in the HLA region (chr6:26 Mb-34 Mb). We analyzed  
446 20 diseases based on two criteria; (i) heritability was reliably estimated (heritability Z-score  $> 2$ ; Supplementary  
447 Table 2); and (ii) both of male and female patients were included.

448

### 449 **Transcription factor binding sites**

450 We obtained 3,158 raw human ChIP-seq data files in SRA format from the GEO database. We converted them to  
451 FASTQ format using the fastq-dump function of SRA Toolkit. We performed QC of sequence reads using FastQC.  
452 We mapped these reads to the genome assembly GRCh37 using Bowtie2 (v2.2.5) with default parameters. We  
453 called peaks using MACS (v2.1) with default parameters ( $q < 0.01$ ) and defined them as TF binding sites. We  
454 excluded TF binding site tracks which do not have at least one binding region in every chromosome, and 2,868  
455 genome-wide TF binding site tracks remained (Supplementary Table 9).

456

### 457 **Stratified LD score regression**

458 We conducted stratified LD score regression (S-LDSC)<sup>25</sup> to partition heritability. For S-LDSC analysis of sex-  
459 specific GWAS of asthma, we used 220 cell-type specific annotations used in previous articles<sup>25,29</sup>. For other S-  
460 LDSC analysis, we used TF binding site tracks which were described in the previous paragraph. For all sites of TF  
461 binding, we empirically extended sites by 500 bp at the both ends for this analysis. We computed annotation-  
462 specific LD scores using the 1000 Genomes Project Phase 3 (version 5) East Asian reference haplotypes<sup>7</sup>. We  
463 estimated heritability enrichment of binding sites of each TF, while we controlled for the merged binding sites of all  
464 TFs and the 53 categories of the full baseline model available at the authors' website (see URLs). We did not use  
465 the baselineLD model (v2.1)<sup>10</sup> in this analysis to avoid false negative findings. We excluded variants in the HLA  
466 region (chr6:26 Mb-34 Mb). We analyzed 24 diseases whose heritability was reliably estimated (heritability Z-score  
467  $> 2$ ; Supplementary Table 2). We calculated the  $P$  value of the regression coefficient. For each trait, we calculate  
468 FDR using the Benjamini-Hochberg method. We set a significance threshold at  $FDR < 0.05$  for this analysis.

469

### 470 **Visualization of TF binding sites**

471 There is a complex correlation structure among 2,868 TF binding site tracks used for S-LDSC analysis. In S-LDSC,  
472 we regress GWAS chi-squared statistics on LD-scores of each TF binding site (TF LD-score), and hence we  
473 focused on correlations between TF LD-scores, not correlations between TF binding sites. We first performed PCA  
474 using all TF LD-scores. To classify them into mutually correlated TF groups, we performed k-means clustering  
475 ( $k=15$ ) using top 15 PCs. We named each cluster by the most dominant TF in each cluster (Figure 4). The list of  
476 each TF binding site and its assigned cluster name was provided in Supplementary Table 9. We then performed  
477 uniform manifold approximation and projection (UMAP)<sup>28</sup> using top 15 PCs to project all TF binding sites into a two-  
478 dimensional space. UMAP was conducted using R package umap (v.0.2.0.0). Our workflow was illustrated in  
479 Supplementary Figure 7.

480

### 481 **Data availability**

482 GWAS summary statistics of the 40 diseases (all except breast cancer and coronary artery disease) are publicly  
483 available at our website (JENGER; see URLs) and the National Bioscience Database Center (NBDC) Human  
484 Database (Research ID: hum0014) without any access restrictions. For breast cancer and coronary artery disease,

485 we will deposit the results after acceptance to the journal due to accompanying projects. GWAS genotype data for  
486 case samples were deposited at the NBDC Human Database (Research ID: hum0014).  
487

488 **References:**

- 489 1. Martin, A. R. *et al.* Clinical use of current polygenic risk scores may exacerbate health disparities. *Nat.*  
490 *Genet.* **51**, 584–591 (2019).
- 491 2. Popejoy, A. B. & Fullerton, S. M. Genomics is failing on diversity. *Nature* **538**, 161–164 (2016).
- 492 3. Morales, J. *et al.* A standardized framework for representation of ancestry data in genomics studies, with  
493 application to the NHGRI-EBI GWAS Catalog. *Genome Biol.* **19**, 21 (2018).
- 494 4. Nagai, A. *et al.* Overview of the BioBank Japan Project: Study design and profile. *J. Epidemiol.* **27**, S2–S8  
495 (2017).
- 496 5. Hirata, M. *et al.* Cross-sectional analysis of BioBank Japan clinical data: A large cohort of 200,000 patients  
497 with 47 common diseases. *J. Epidemiol.* **27**, S9–S21 (2017).
- 498 6. Zhou, W. *et al.* Efficiently controlling for case-control imbalance and sample relatedness in large-scale  
499 genetic association studies. *Nat. Genet.* **50**, 1335–1341 (2018).
- 500 7. Auton, A. *et al.* A global reference for human genetic variation. *Nature* **526**, 68–74 (2015).
- 501 8. Bulik-Sullivan, B. K. *et al.* LD Score regression distinguishes confounding from polygenicity in genome-wide  
502 association studies. *Nat Genet* **47**, 291–295 (2015).
- 503 9. Gazal, S., Marquez-Luna, C., Finucane, H. K. & Price, A. L. Reconciling S-LDSC and LDK functional  
504 enrichment estimates. *Nat. Genet.* **51**, 1202–1204 (2019).
- 505 10. Gazal, S. *et al.* Linkage disequilibrium-dependent architecture of human complex traits shows action of  
506 negative selection. *Nat. Genet.* **49**, 1421–1427 (2017).
- 507 11. Hirata, J. *et al.* Genetic and phenotypic landscape of the major histocompatibility complex region in the  
508 Japanese population. *Nat. Genet.* **51**, 470–480 (2019).
- 509 12. van der Harst, P. & Verweij, N. The Identification of 64 Novel Genetic Loci Provides an Expanded View on  
510 the Genetic Architecture of Coronary Artery Disease. *Circ. Res.* CIRCRESAHA.117.312086 (2017).  
511 doi:10.1161/CIRCRESAHA.117.312086
- 512 13. Ma, T., Wu, S., Yan, W., Xie, R. & Zhou, C. A functional variant of *ATG16L2* is associated with Crohn's  
513 disease in the Chinese population. *Color. Dis.* **18**, O420–O426 (2016).
- 514 14. Calvete, O. *et al.* The wide spectrum of POT1 gene variants correlates with multiple cancer types. *Eur. J.*  
515 *Hum. Genet.* **25**, 1278–1281 (2017).
- 516 15. Bainbridge, M. N. *et al.* Germline Mutations in Shelterin Complex Genes Are Associated With Familial  
517 Glioma. *J Natl Cancer Inst* **107**, 384 (2015).
- 518 16. Robles-Espinoza, C. D. *et al.* POT1 loss-of-function variants predispose to familial melanoma. *Nat. Genet.*  
519 **46**, 478–481 (2014).
- 520 17. Ng, P. C. & Henikoff, S. Predicting deleterious amino acid substitutions. *Genome Res.* **11**, 863–74 (2001).
- 521 18. Rentzsch, P., Witten, D., Cooper, G. M., Shendure, J. & Kircher, M. CADD: predicting the deleteriousness of  
522 variants throughout the human genome. *Nucleic Acids Res.* **47**, D886–D894 (2019).
- 523 19. Kawase, T. *et al.* PH Domain-Only Protein PHLDA3 Is a p53-Regulated Repressor of Akt. *Cell* **136**, 535–  
524 550 (2009).

- 525 20. Bujor, A. M. *et al.* Akt Blockade Downregulates Collagen and Upregulates MMP1 in Human Dermal  
526 Fibroblasts. *J. Invest. Dermatol.* **128**, 1906–1914 (2008).
- 527 21. Ishigaki, K. *et al.* Polygenic burdens on cell-specific pathways underlie the risk of rheumatoid arthritis. *Nat.*  
528 *Genet.* **49**, 1120–1125 (2017).
- 529 22. Aguet, F. *et al.* Genetic effects on gene expression across human tissues. *Nature* **550**, 204–213 (2017).
- 530 23. Kobayashi, Y. *et al.* Mice Lacking Hypertension Candidate Gene ATP2B1 in Vascular Smooth Muscle Cells  
531 Show Significant Blood Pressure Elevation. *Hypertension* **59**, 854–860 (2012).
- 532 24. Bulik-Sullivan, B. *et al.* An atlas of genetic correlations across human diseases and traits. *Nat. Genet.* **47**,  
533 1236–1241 (2015).
- 534 25. Finucane, H. K. *et al.* Partitioning heritability by functional annotation using genome-wide association  
535 summary statistics. *Nat. Genet.* **47**, 1228–1235 (2015).
- 536 26. Frati, F. *et al.* The Role of the Microbiome in Asthma: The Gut–Lung Axis. *Int. J. Mol. Sci.* **20**, 123 (2018).
- 537 27. Stokholm, J. *et al.* Maturation of the gut microbiome and risk of asthma in childhood. *Nat. Commun.* **9**, 141  
538 (2018).
- 539 28. McInnes, L., Healy, J. & Melville, J. UMAP: Uniform Manifold Approximation and Projection for Dimension  
540 Reduction. (2018).
- 541 29. Kanai, M. *et al.* Genetic analysis of quantitative traits in the Japanese population links cell types to complex  
542 human diseases. *Nat. Genet.* **50**, 390–400 (2018).
- 543 30. Matsuda, M., Sakamoto, N. & Fukumaki, Y. Delta-thalassemia caused by disruption of the site for an  
544 erythroid-specific transcription factor, GATA-1, in the delta-globin gene promoter. *Blood* **80**, 1347–51 (1992).
- 545 31. De Gobbi, M. *et al.* A regulatory SNP causes a human genetic disease by creating a new transcriptional  
546 promoter. *Science* **312**, 1215–7 (2006).
- 547 32. Pevny, L. *et al.* Erythroid differentiation in chimaeric mice blocked by a targeted mutation in the gene for  
548 transcription factor GATA-1. *Nature* **349**, 257–260 (1991).
- 549 33. Elhanati, Y., Marcou, Q., Mora, T. & Walczak, A. M. RepgenHMM: A dynamic programming tool to infer the  
550 rules of immune receptor generation from sequence data. *Bioinformatics* **32**, 1943–1951 (2016).
- 551 34. Welch, J. J. *et al.* Global regulation of erythroid gene expression by transcription factor GATA-1. *Blood* **104**,  
552 3136–3147 (2004).
- 553 35. Lantz, K. A. *et al.* Foxa2 regulates multiple pathways of insulin secretion. *J. Clin. Invest.* **114**, 512–520  
554 (2004).
- 555 36. Bowen, C. *et al.* Loss of NKX3.1 expression in human prostate cancers correlates with tumor progression.  
556 *Cancer Res.* **60**, 6111–5 (2000).
- 557 37. Prokunina-Olsson, L. *et al.* A variant upstream of IFNL3 (IL28B) creating a new interferon gene IFNL4 is  
558 associated with impaired clearance of hepatitis C virus. *Nat. Genet.* **45**, 164–171 (2013).
- 559 38. Wolfe, D., Dudek, S., Ritchie, M. D. & Pendergrass, S. A. Visualizing genomic information across  
560 chromosomes with PhenoGram. *BioData Min.* **6**, 18 (2013).
- 561 39. Aguet, F. *et al.* Genetic effects on gene expression across human tissues. *Nature* **550**, 204–213 (2017).

- 562 40. Kuriyama, S. *et al.* The Tohoku Medical Megabank Project: Design and Mission. *J. Epidemiol.* **26**, 493–511  
563 (2016).
- 564 41. Altshuler, D. M. *et al.* Integrating common and rare genetic variation in diverse human populations. *Nature*  
565 **467**, 52–58 (2010).
- 566 42. Okada, Y. *et al.* Deep whole-genome sequencing reveals recent selection signatures linked to evolution and  
567 disease risk of Japanese. *Nat. Commun.* **9**, 1631 (2018).
- 568 43. Pruim, R. J. *et al.* LocusZoom: regional visualization of genome-wide association scan results.  
569 *Bioinformatics* **26**, 2336–2337 (2010).
- 570 44. Chang, C. C. *et al.* Second-generation PLINK: rising to the challenge of larger and richer datasets.  
571 *Gigascience* **4**, 7 (2015).
- 572 45. Wang, K., Li, M. & Hakonarson, H. ANNOVAR: functional annotation of genetic variants from high-  
573 throughput sequencing data. *Nucleic Acids Res.* **38**, e164 (2010).
- 574  
575

576 **URLs.**

577 BBJ, <https://biobankjp.org/english/index.html>  
578 JENGER, <http://jenger.riken.jp/en/>  
579 PLINK 1.9, <https://www.cog-genomics.org/plink2>  
580 MACH, <http://csg.sph.umich.edu/abecasis/MaCH/>  
581 Minimac, <https://genome.sph.umich.edu/wiki/Minimac>  
582 SAIGE, <https://github.com/weizhouUMICH/SAIGE>  
583 GWAS Catalog, <https://www.ebi.ac.uk/gwas/>  
584 Neale Lab, <http://www.nealelab.is/uk-biobank>  
585 PASCAL, <https://www2.unil.ch/cbg/index.php?title=Pascal>  
586 ldsc, <https://github.com/bulik/ldsc/>  
587 LD score, <https://data.broadinstitute.org/alkesgroup/LDSCORE/>  
588 ANNOVAR, <http://annovar.openbioinformatics.org/en/latest/>  
589 Locuszoom, <http://locuszoom.sph.umich.edu/locuszoom/>  
590 R, <https://www.r-project.org/>  
591 SRA Toolkit, <https://www.ncbi.nlm.nih.gov/sra/docs/toolkitsoft/>  
592 FASTQC, <https://www.bioinformatics.babraham.ac.uk/projects/fastqc/>  
593 Bowtie2, <http://bowtie-bio.sourceforge.net/bowtie2/manual.shtml>  
594 MACS, <https://github.com/taoliu/MACS>  
595 NBDC Human Database, <https://humandbs.biosciencedbc.jp/en/>  
596 1000 Genomes Project, [www.1000genomes.org/](http://www.1000genomes.org/)

597

598 **ACKNOWLEDGMENTS:**

599 We acknowledge the staff of BBJ for their outstanding assistance. We express our heartfelt gratitude to Tohoku  
600 University Tohoku Medical Megabank Organization (ToMMo), Iwate Medical University Iwate Tohoku Medical  
601 Megabank Organization (IMM), the Japan Public Health Center–based Prospective (JPHC) Study, and the Japan  
602 Multi-Institutional Collaborative Cohort (J-MICC) Study for their invaluable contributions to collecting control  
603 samples. We also express our gratitude to E.K. and H.S. for kindly sharing their results of ChIP-seq data analysis.  
604 We extend our appreciation to Y. Yukawa, Y. Yokoyama, and other members of the Laboratory for Statistical  
605 Analysis, RIKEN Center for Integrative Medical Sciences for their great support. This research was supported by  
606 the Tailor-Made Medical Treatment Program (the BioBank Japan Project) of the Ministry of Education, Culture,  
607 Sports, Science, and Technology (MEXT) and the Japan Agency for Medical Research and Development (AMED).  
608 The JPHC Study has been supported by the National Cancer Center Research and Development Fund since 2011  
609 and was supported by a Grant-in-Aid for Cancer Research from the Ministry of Health, Labour and Welfare of  
610 Japan from 1989 to 2010. The study of psychiatric disorders was supported by AMED under Grant Numbers  
611 JP18dm0107097, JP18km0405201 and JP18km0405208.

612

613 **AUTHOR CONTRIBUTIONS:**

614 K.Ishigaki wrote the manuscript with critical inputs from S.R and Y.Kamatani. K.Ishigaki conducted all bioinformatics  
615 analyses with the help of M.A, M.Kanai, A.T, S.S, N.Matoba, S.K.L, Y.O, C.Terao, T.A, S.G, S.R, and Y.Kamatani.  
616 Y.Momozawa and M.Kubo performed genotyping. H.S and E.K. analyzed ChIP-seq data. M. Ikeda and N. I  
617 managed GWAS data of psychiatric diseases. S.K.L, Y.Kochi, M.Horikoshi, Ken Suzuki, K.Ito, M.Hirata, K.M, S.I,  
618 I.K, T.Tanaka, H.N, A.Suzuki, T.H, M.T, K.C, D.M, M.M, S.N, Y.D, Y.Miki, T.Katagiri, O.O, W.O, H.I, T.Yoshida, I.I,  
619 T.Takahashi, C.Tanikawa, T.S, N.Sinozaki, S.Minami, H.Yamaguchi, S.A, Y.T, K.Yamaji, K.T, T.F, R.T, H.Yanai,  
620 A.M, Y.Koretsune, H.K, M.H, S.Murayama, K.Yamamoto, Y.Murakami, Y.N, J.I, T.Yamauchi, T.Kadowaki, M.Kubo,  
621 and Y.Kamatani contributed to the management of BBJ data. N.Minegishi, Kichiya Suzuki, K.Tanno, A.Shimizu,  
622 T.Yamaji, M.Iwasaki, N.Sawada, H.U, K.Tanaka, M.N, M.S, K.W, S.T, and M.Y contributed to the management of  
623 cohort control data. S.R, J.I, T.Yamauchi, T.Kadowaki, M.Kubo, and Y.Kamatani jointly supervised this study.  
624

625 **COMPETING FINANCIAL INTERESTS:**

626 The authors declare no competing financial interests.

627
